# Supplementary material for: Molecular Epidemiology and Evolution of Coxsackievirus A14
Source: MDPI journal article supplement (doi:10.3390/v15122323), 2023-11-26
Supplement: s1 [file s1]

**Supplementary Table S2** Information on 22 full-length VP1 sequences retrieved from GenBank

| GenBank number | Collection date | Country      | Region              |
|----------------|-----------------|--------------|---------------------|
| AF081304.1     | 1950            | South Africa | /                   |
| KC879495.1     | 2005            | Russia       | /                   |
| GQ253379.1     | 2006            | China        | Shandong            |
| LT719061.1     | 2007            | Madagascar   | Anjozorobe          |
| JN203533.1     | 2007            | India        | /                   |
| JN203539.1     | 2009            | India        | /                   |
| JN639893.1     | 2010            | China        | Jiangsu             |
| JN639894.1     | 2010            | China        | Jiangsu             |
| LT719062.1     | 2011            | Madagascar   | Toliara, Tsimenatse |
| OK570249.1     | 2011            | Madagascar   | /                   |
| KX032521.1     | 2011            | China        | Henan               |
| KP036482.1     | 2012            | China        | Jiangsu             |
| KP036483.1     | 2012            | China        | Jiangsu             |
| KX032522.1     | 2013            | China        | Henan               |
| KX032523.1     | 2013            | China        | Henan               |
| KX032524.1     | 2013            | China        | Henan               |
| KX032525.1     | 2013            | China        | Henan               |
| KX032526.1     | 2013            | China        | Henan               |
| MG672482.1     | 2014            | China        | Senegal             |
| LC013432.1     | 2014            | China        | Yunnan              |
| LC411976.1     | 2014            | China        | Yunnan              |
| LC411977.1     | 2014            | China        | Yunnan              |

**Supplementary Table S4** Result of the worldwide spatial diffusion analyzed by Spread3

| From | To  | Bayes Factor | Posterior Probability |
|------|-----|--------------|-----------------------|
| CHN  | IN  | 1.11066535   | 0.20643729            |
| CHN  | MAD | 1.93504447   | 0.31187569            |
| CHN  | RUS | 2.10996510   | 0.33074362            |
| CHN  | SN  | 1.31369020   | 0.23529412            |
| CHN  | ZA  | 0.76560283   | 0.15205327            |
| IN   | MAD | 2.26159908   | 0.34628191            |
| IN   | RUS | 1.91509419   | 0.30965594            |
| IN   | SN  | 3.02996287   | 0.41509434            |
| IN   | ZA  | 1.13333455   | 0.20976693            |
| MAD  | RUS | 3.27327807   | 0.43396226            |
| MAD  | SN  | 1.75999482   | 0.29189789            |
| MAD  | ZA  | 1.24170073   | 0.22530522            |
| RUS  | SN  | 1.86577531   | 0.30410655            |
| RUS  | ZA  | 1.15619560   | 0.21309656            |
| SN   | ZA  | 1.43794502   | 0.25194229            |
| IN   | CHN | 1.99567513   | 0.31853496            |
| MAD  | CHN | 3.31790985   | 0.43729190            |
| RUS  | CHN | 4.80317978   | 0.52941176            |
| SN   | CHN | 2.13119458   | 0.33296337            |
| ZA   | CHN | 1.85600577   | 0.30299667            |
| MAD  | IN  | 1.81723679   | 0.29855716            |
| RUS  | IN  | 1.64868120   | 0.27857936            |
| SN   | IN  | 2.51501007   | 0.37069922            |
| ZA   | IN  | 6.29867532   | 0.59600444            |
| RUS  | MAD | 2.94779264   | 0.40843507            |
| SN   | MAD | 2.28385153   | 0.34850166            |
| ZA   | MAD | 2.46748290   | 0.36625971            |
| SN   | RUS | 1.88540817   | 0.30632630            |
| ZA   | RUS | 2.58757160   | 0.37735849            |
| ZA   | SN  | 3.53337363   | 0.45283019            |

**Supplementary Table S5** Result of the spatial diffusion in mainland China analyzed by SpreaD3

| From | To   | Bayes Factor | Posterior Probability |
|------|------|--------------|-----------------------|
| SD06 | JS10 | 10.82867852  | 0.46836848            |
| SD06 | JS12 | 0.83010099   | 0.06326304            |
| SD06 | YN14 | 0.83010099   | 0.06326304            |
| SD06 | LN13 | 1.08365502   | 0.08102109            |
| SD06 | TJ13 | 0.87690749   | 0.06659267            |
| SD06 | SN15 | 0.89258395   | 0.06770255            |
| SD06 | SC13 | 1.06752115   | 0.07991121            |
| SD06 | BJ13 | 0.93983808   | 0.07103219            |
| SD06 | HE13 | 5.74529124   | 0.31853496            |
| SD06 | HE09 | 0.87690749   | 0.06659267            |
| SD06 | HA13 | 4.61628199   | 0.27302997            |
| SD06 | HA11 | 2.81711016   | 0.18645949            |
| SD06 | HA19 | 0.95566483   | 0.07214206            |
| HE09 | HA13 | 1.46579716   | 0.10654828            |
| HE09 | HA11 | 2.31881102   | 0.15871254            |
| HE09 | HA19 | 1.48290800   | 0.10765816            |
| HE09 | JS10 | 1.13229129   | 0.08435072            |
| HE09 | JS12 | 1.51725770   | 0.10987791            |
| HE09 | YN14 | 1.44872878   | 0.10543840            |
| HE09 | LN13 | 1.18128257   | 0.08768036            |
| HE09 | TJ13 | 1.51725770   | 0.10987791            |
| HE09 | SN15 | 1.41471875   | 0.10321865            |
| HE09 | SC13 | 2.07246640   | 0.14428413            |
| HE09 | BJ13 | 1.31369144   | 0.09655938            |
| HE09 | HE13 | 1.06752115   | 0.07991121            |
| JS10 | JS12 | 1.36401824   | 0.09988901            |
| JS10 | YN14 | 1.97991623   | 0.13873474            |
| JS10 | LN13 | 1.00337306   | 0.07547170            |
| JS10 | TJ13 | 1.38087668   | 0.10099889            |
| JS10 | SN15 | 1.63884266   | 0.11764706            |
| JS10 | SC13 | 1.43170269   | 0.10432852            |
| JS10 | BJ13 | 1.67397548   | 0.11986681            |
| JS10 | HE13 | 1.23063276   | 0.09100999            |
| JS10 | HA13 | 2.14737532   | 0.14872364            |
| JS10 | HA11 | 7.73486317   | 0.38623751            |
| JS10 | HA19 | 0.90829778   | 0.06881243            |
| HA11 | HA19 | 0.73747920   | 0.05660377            |
| HA11 | JS12 | 6.51085198   | 0.34628191            |
| HA11 | YN14 | 10.35587691  | 0.45726970            |
| HA11 | LN13 | 0.37970897   | 0.02996670            |
| HA11 | TJ13 | 2.63385427   | 0.17647059            |

|      |      |             |            |
|------|------|-------------|------------|
| HA11 | SN15 | 6.80260982  | 0.35627081 |
| HA11 | SC13 | 8.80292627  | 0.41731410 |
| HA11 | BJ13 | 50.63185766 | 0.80466149 |
| HA11 | HE13 | 0.48201255  | 0.03773585 |
| HA11 | HA13 | 1.09982790  | 0.08213097 |
| JS12 | YN14 | 2.65399621  | 0.17758047 |
| JS12 | LN13 | 0.98743218  | 0.07436182 |
| JS12 | TJ13 | 3.21915522  | 0.20754717 |
| JS12 | SN15 | 4.18855992  | 0.25416204 |
| JS12 | SC13 | 1.99833072  | 0.13984462 |
| JS12 | BJ13 | 1.72700824  | 0.12319645 |
| JS12 | HE13 | 1.08365502  | 0.08102109 |
| JS12 | HA13 | 1.24716327  | 0.09211987 |
| JS12 | HA19 | 2.12857494  | 0.14761376 |
| HE13 | HA13 | 3.50679599  | 0.22197558 |
| HE13 | HA19 | 0.93983808  | 0.07103219 |
| HE13 | YN14 | 0.92404911  | 0.06992231 |
| HE13 | LN13 | 1.74477545  | 0.12430633 |
| HE13 | TJ13 | 0.61599855  | 0.04772475 |
| HE13 | SN15 | 0.90829778  | 0.06881243 |
| HE13 | SC13 | 1.03536991  | 0.07769145 |
| HE13 | BJ13 | 0.79908108  | 0.06104329 |
| HA13 | HA19 | 0.93983808  | 0.07103219 |
| HA13 | YN14 | 1.08365502  | 0.08102109 |
| HA13 | LN13 | 1.05142616  | 0.07880133 |
| HA13 | TJ13 | 0.87690749  | 0.06659267 |
| HA13 | SN15 | 0.86126826  | 0.06548280 |
| HA13 | SC13 | 0.83010099  | 0.06326304 |
| HA13 | BJ13 | 1.09982790  | 0.08213097 |
| HA13 | HE13 | 1.41471875  | 0.10321865 |
| LN13 | TJ13 | 0.97152948  | 0.07325194 |
| LN13 | SN15 | 0.79908108  | 0.06104329 |
| LN13 | SC13 | 0.69165692  | 0.05327414 |
| LN13 | BJ13 | 1.01935225  | 0.07658158 |
| LN13 | HE13 | 15.39487821 | 0.55604883 |
| LN13 | HA13 | 7.59104857  | 0.38179800 |
| LN13 | HA19 | 1.00337306  | 0.07547170 |
| LN13 | YN14 | 0.78362606  | 0.05993341 |
| TJ13 | SN15 | 1.78044533  | 0.12652608 |
| TJ13 | SC13 | 1.58647362  | 0.11431743 |
| TJ13 | BJ13 | 1.60388616  | 0.11542730 |
| SC13 | BJ13 | 1.69160842  | 0.12097669 |
| TJ13 | HE13 | 1.34720132  | 0.09877913 |
| SC13 | HE13 | 1.81629696  | 0.12874584 |

|      |      |             |            |
|------|------|-------------|------------|
| TJ13 | HA13 | 1.39777680  | 0.10210877 |
| SC13 | HA13 | 1.31369144  | 0.09655938 |
| TJ13 | HA19 | 2.43538121  | 0.16537181 |
| SC13 | HA19 | 2.01679280  | 0.14095450 |
| TJ13 | YN14 | 1.81629696  | 0.12874584 |
| SC13 | YN14 | 1.55177914  | 0.11209767 |
| TJ13 | LN13 | 1.43170269  | 0.10432852 |
| SC13 | LN13 | 1.28034583  | 0.09433962 |
| SC13 | TJ13 | 2.43538121  | 0.16537181 |
| SC13 | SN15 | 1.78044533  | 0.12652608 |
| BJ13 | HE13 | 0.90829778  | 0.06881243 |
| BJ13 | HA13 | 1.08365502  | 0.08102109 |
| BJ13 | HA19 | 1.36401824  | 0.09988901 |
| BJ13 | YN14 | 2.22306966  | 0.15316315 |
| BJ13 | LN13 | 0.92404911  | 0.06992231 |
| BJ13 | TJ13 | 2.14737532  | 0.14872364 |
| BJ13 | SN15 | 2.45499066  | 0.16648169 |
| BJ13 | SC13 | 4.33702730  | 0.26082131 |
| YN14 | SN15 | 3.57469620  | 0.22530522 |
| YN14 | HA19 | 14.39417225 | 0.53940067 |
| SN15 | HA19 | 2.20407177  | 0.15205327 |

---
