# Supplementary material for: Molecular Epidemiology and Evolution of Coxsackievirus A14
Source: MDPI journal article supplement (doi:10.3390/v15122323), 2023-11-26
Supplement: s1 [file s1]

## Supplementary data

**Supplementary Table S1** Information on primers for amplifying all regions of 15 CVA14 strains.

| Primer      | Position (nt) | Primer sequence (5'-3')                         | Orientation |
|-------------|---------------|-------------------------------------------------|-------------|
| 0001S48     |               | GGGGACAAGTTTGTACAAAAAAGCAGGCTTTAAACAGCTCTGGGGTT | Forward     |
| CVA14-872R  | 872-891       | TTGGTGAAGTTCAGGGTGGA                            | Reverse     |
| CVA14-636F  | 617-636       | AGCTATTGGATTGGCCATCC                            | Forward     |
| CVA14-1419R | 1419-1438     | GGGGGTGTGTGTGTTTCATTA                           | Reverse     |
| CVA14-815F  | 798-815       | AACACCGTTCGTGATGGG                              | Forward     |
| CVA14-1640R | 1640-1657     | CTGAAGATGCATAGGCCA                              | Reverse     |
| CVA14-1489F | 1470-1489     | GTGTTGGATGCTGGTATAACC                           | Forward     |
| CVA14-2407R | 2407-2426     | GTGTCTCAGCTGGTACAACA                            | Reverse     |
| CVA14-2135F | 2119-2135     | GCTTACACTCCACCAGG                               | Forward     |
| CVA14-2974R | 2974-2993     | TGCCATTCATAGGTGTTGCG                            | Reverse     |
| CVA14-2871F | 2852-2871     | ATAGCTTCCACCCCAGATGG                            | Forward     |
| CVA14-3721R | 3721-3740     | ATGCCAACAACACCGTGTTG                            | Reverse     |
| CVA14-3560F | 3541-3560     | AAACACTACCCAGTCAGCTT                            | Forward     |
| CVA14-4470R | 4470-4490     | CAGGTTCAATACGGTGTTTGC                           | Reverse     |
| CVA14-4307F | 4288-4307     | TCTGCTGCTTCACAAGAGGA                            | Forward     |
| CVA14-4871R | 4871-4890     | TGAGTCCGTCACCTCAATGT                            | Reverse     |
| CVA14-4589F | 4570-4589     | CTGTCGTAAGTTCCAACCAC                            | Forward     |

|               |                      |                                               |                    |
|---------------|----------------------|-----------------------------------------------|--------------------|
| CVA14-5401R   | 5401-5420            | AGGTCGCTAATAGCATCCGG                          | Reverse            |
| <b>Primer</b> | <b>Position (nt)</b> | <b>Primer sequence (5'-3')</b>                | <b>Orientation</b> |
| CVA14-5070F   | 5050-5070            | GACCACCCAAGTTTAGACCAA                         | Forward            |
| CVA14-5863R   | 5863-5882            | GACCTGCCTTAGTGGGAAAA                          | Reverse            |
| CVA14-5742F   | 5723-5742            | ATGCCATCAATGTTTGTGCC                          | Forward            |
| CVA14-6689R   | 6689-6711            | CTAGCATCATAACCTGAGTAGTC                       | Reverse            |
| CVA14-6478F   | 6457-6478            | AAAGGGAAATCTCGCCTGATAG                        | Forward            |
| CVA14-7410R   | 7410-7429            | GTGGATACAAATTTACCCCC                          | Reverse            |
| CVA14-6911F   | 6892-6911            | TTGTGTCCTTGGTGGAATGC                          | Forward            |
| 7500A         |                      | GGGGACCACTTTGTACAAGAAAGCTGGG(T) <sub>24</sub> | Reverse            |

**Supplementary Table S3** Nucleotide and amino identity (%) of 15 CVA14 strains compared with the CVA14 prototype strain (AY421769.1/G-14)

| Name of strain  | 5'UTR | P1             |                |                |                | P2             |                |                | P3             |                |                |                | 3'UTR |
|-----------------|-------|----------------|----------------|----------------|----------------|----------------|----------------|----------------|----------------|----------------|----------------|----------------|-------|
|                 |       | VP4            | VP3            | VP2            | VP1            | 2A             | 2B             | 2C             | 3A             | 3B             | 3C             | 3D             |       |
| CHN_2013_BJ_30  | 85.3  | 86.9<br>(89.7) | 83.8<br>(97.9) | 83.3<br>(97.2) | 81.9<br>(95.9) | 81.7<br>(95.3) | 82.4<br>(100)  | 84.2<br>(98.7) | 82.5<br>(98.8) | 93.9<br>(95.4) | 85.2<br>(98.3) | 84.6<br>(96.3) | 93.8  |
| CHN_2013_BJ_59  | 85.9  | 85.9<br>(89.7) | 84.5<br>(97.9) | 83<br>(97.2)   | 82.6<br>(95.9) | 81.5<br>(95.3) | 82.8<br>(100)  | 84.1<br>(98.7) | 82.5<br>(98.8) | 90.9<br>(95.4) | 84.8<br>(98.3) | 84.7<br>(96.1) | 93.8  |
| CHN_2009_HE_27  | 86.9  | 87.4<br>(89.7) | 84.5<br>(97.9) | 82<br>(96.8)   | 82.9<br>(96.2) | 81.3<br>(95.3) | 82.4<br>(100)  | 85.2<br>(98.4) | 79.4<br>(98.8) | 92.4<br>(100)  | 83<br>(97.8)   | 84.7<br>(97.8) | 91.3  |
| CHN_2013_HE_81  | 86.7  | 86.9<br>(91.1) | 84.8<br>(97.5) | 82.4<br>(98.4) | 82.9<br>(96.6) | 81.3<br>(94)   | 81.4<br>(98.9) | 85.3<br>(97.8) | 79.8<br>(98.8) | 87.8<br>(100)  | 83.6<br>(96.7) | 84<br>(96.7)   | 93.8  |
| CHN_2019_HA_317 | 86.6  | 85<br>(91.1)   | 84.9<br>(97.9) | 83.9<br>(97.6) | 82.8<br>(95.9) | 81.1<br>(94.6) | 83.5<br>(98.9) | 85<br>(98.4)   | 82.5<br>(97.6) | 87.8<br>(100)  | 85.4<br>(98.3) | 84.1<br>(96.3) | 91.3  |
| CHN_2013_HA_07  | 86.7  | 86.4<br>(89.7) | 84.8<br>(97.9) | 83.4<br>(97.6) | 82.3<br>(95.9) | 80.8<br>(94.6) | 82.8<br>(100)  | 84.4<br>(98.7) | 83.3<br>(98.8) | 93.9<br>(95.4) | 84.6<br>(98.3) | 84<br>(95.8)   | 92.5  |
| CHN_2013_HA_08  | 85.6  | 86.4<br>(91.1) | 84.9<br>(97.9) | 82.8<br>(98.4) | 82.5<br>(96.9) | 82<br>(94)     | 81.1<br>(98.9) | 85.4<br>(98.1) | 79.8<br>(98.8) | 89.3<br>(100)  | 83.6<br>(96.1) | 84.3<br>(96.9) | 93.8  |
| CHN_2013_HA_25  | 86.3  | 86.4<br>(89.7) | 84.2<br>(97.9) | 83.4<br>(97.2) | 81.8<br>(95.9) | 81.5<br>(95.3) | 82.8<br>(100)  | 84.2<br>(98.7) | 82.9<br>(98.8) | 93.9<br>(95.4) | 84.8<br>(98.3) | 84.5<br>(96.1) | 93.8  |
| CHN_2013_HA_90  | 85.9  | 86.4<br>(89.7) | 84.5<br>(97.9) | 83.4<br>(97.6) | 82<br>(95.9)   | 81.5<br>(94.6) | 82.1<br>(100)  | 84.5<br>(98.4) | 83.3<br>(98.8) | 93.9<br>(95.4) | 84.6<br>(98.3) | 84.4<br>(96.3) | 92.5  |
| CHN_2013_LN_05  | 87    | 87.4<br>(91.1) | 83.6<br>(97.5) | 83<br>(96.8)   | 82.2<br>(95.9) | 82.4<br>(95.3) | 83.1<br>(100)  | 84.3<br>(98.7) | 82.9<br>(98.8) | 90.9<br>(95.4) | 85.6<br>(98.3) | 84.5<br>(96.1) | 92.5  |

| CHN_2013_TJ_52 | 86.1  | 86.4<br>(89.7) | 84.4<br>(97.9) | 82.9<br>(97.2) | 82.2<br>(95.9) | 80.6<br>(94.6) | 82.1<br>(100)  | 84.4<br>(98.7) | 82.1<br>(98.8) | 93.9<br>(95.4) | 85.4<br>(98.3) | 84.1<br>(96.3) | 93.8  |
|----------------|-------|----------------|----------------|----------------|----------------|----------------|----------------|----------------|----------------|----------------|----------------|----------------|-------|
| Name of strain | 5'UTR | P1             |                |                |                | P2             |                |                | P3             |                |                |                | 3'UTR |
|                |       | VP4            | VP3            | VP2            | VP1            | 2A             | 2B             | 2C             | 3A             | 3B             | 3C             | 3D             |       |
| CHN_2014_YN_41 | 86.5  | 87.9<br>(89.7) | 84.2<br>(97.9) | 83.2<br>(97.2) | 81.9<br>(95.6) | 81.1<br>(94.6) | 83.1<br>(97.9) | 84.3<br>(98.7) | 82.9<br>(98.8) | 95.4<br>(95.4) | 84.8<br>(98.9) | 84.1<br>(96.3) | 91.3  |
| CHN_2015_SN_61 | 89.9  | 89.4<br>(89.8) | 84.5<br>(97.9) | 84.1<br>(97.2) | 82.2<br>(95.9) | 84.6<br>(96)   | 85.1<br>(100)  | 83.7<br>(97.8) | 83.3<br>(97.6) | 84.8<br>(90.9) | 84.1<br>(97.2) | 83.9<br>(95.6) | 92.5  |
| CHN_2013_SC_30 | 85    | 86.9<br>(91.1) | 84.4<br>(97.9) | 83<br>(97.2)   | 82.6<br>(95.9) | 81.1<br>(95.3) | 82.8<br>(100)  | 83.9<br>(98.4) | 82.9<br>(98.8) | 92.4<br>(95.4) | 85.7<br>(98.3) | 84.7<br>(96.3) | 92.5  |
| CHN_2013_SC_36 | 86.8  | 86.9<br>(91.1) | 84.5<br>(97.9) | 82.6<br>(97.2) | 82.5<br>(95.9) | 81.5<br>(95.3) | 82.8<br>(98.9) | 84.1<br>(98.7) | 82.9<br>(98.8) | 93.9<br>(100)  | 85.4<br>(98.3) | 84.4<br>(96.3) | 92.5  |
